# Supplementary material for: Bi2O3nanoparticles encapsulated in surface mounted metal–organic framework thin films
Source: Royal Society of Chemistry journal article supplement (doi:10.1039/c6nr00532b), 2016-01-01
Supplement: c6nr00532b1.pdf [file c6nr00532b1.pdf]

# Supporting Information Material

## **Bi<sub>2</sub>O<sub>3</sub> nanoparticles encapsulated in surface mounted metal-organic frameworks thin films**

Wei Guo<sup>1</sup>, Chen Zhi<sup>2</sup>, Chengwu Yang<sup>1</sup>, Tobias Neumann<sup>2</sup>, Christian Kübel<sup>2, 3</sup>, Wolfgang Wenzel<sup>2</sup>,  
Alexander Welle<sup>1, 3</sup>, Wilhelm Pfleging<sup>3, 4</sup>, Osama Shekhah<sup>5</sup>, Christof Wöll<sup>1</sup>, Engelbert Redel\*<sup>1</sup>

<sup>1</sup>Karlsruhe Institute of Technology, Institute of Functional Interfaces (IFG), Hermann-von-Helmholtz-Platz  
1, 76344 Eggenstein-Leopoldshafen, Germany

<sup>2</sup>Karlsruhe Institute of Technology, Institute of Nanotechnology (INT), Hermann-von-Helmholtz-Platz 1,  
76344 Eggenstein-Leopoldshafen, Germany

<sup>3</sup>Karlsruhe Institute of Technology, Karlsruhe Nano Micro Facility (KNMF), Hermann-von-Helmholtz-Platz  
1, 76344 Eggenstein-Leopoldshafen, Germany

<sup>4</sup>Karlsruhe Institute of Technology, Institute of Advanced Materials (IAM), Hermann-von-  
Helmholtz-Platz 1, 76344 Eggenstein-Leopoldshafen, Germany

<sup>5</sup>Advanced Membranes and Porous Materials Center, King Abdulah University of Science and  
Technology, Kingdom of Saudi-Arabia

### *Materials and Methods:*

*X-ray Diffraction (XRD):* Each sample was characterized by using a Bruker D8 Advance equipped with a Si-strip detector (PSD Lynxeye©; position sensitive detector) with Cu K<sub>α1,2</sub> radiation ( $\lambda = 0.15418$  nm) in  $\theta$ - $\theta$  geometry, variable slit on primary circle. Scans were run over various ranges with step width of  $0.024^\circ$   $2\theta$  and 84 seconds, for higher order peaks up to 336 seconds per step. The  $2\theta$  angle scanning range to observe corresponding peak to deposited film is picked  $5^\circ$  to  $60^\circ$ .

*Infrared reflection absorption (IRRA) spectroscopy:* IRRA spectra were measured using the infrared spectrometer (Bruker VERTEX 80) purged with dried air. The spectra were recorded in grazing incidence reflection mode at a fixed angle of incidence of  $80^\circ$  relative to the surface normal using mercury cadmium telluride (MCT) detector. Perdeuterated hexadecanethiol SAM on Au/Ti/Silicon substrates were used for reference measurements.

*Scanning electron microscopy (SEM):* HR-SEM cross-sectional measurements have been performed on a Zeiss HR-SEM (Gemini Class) at 3-5 kV to check the continuity, compactness, and homogeneity of the different prepared (loaded and unloaded) HKUST-1 thin films.

*Quartz Crystal Microbalance (QCM):* A quartz crystal microbalance (QCM) was employed to growth an HKUST-1 SURMOF thin film on a QCM sensor in a clean and well-controlled manner to further perform the uptake BiPh<sub>3</sub> experiments. The QCM sensor was placed in a flow cell (Q-Sense E4). Infiltration with guest

35 molecules was achieved via a stream of liquid through the cell. The grown SURMOF QCM sensor was grown  
36 directly on gold wafer, which was functionalization with a 16-mercaptohexadecanoic acid self-assembled  
37 monolayer (MHDA SAM). SURMOF growth was carried out in situ in the QCM flow cell by alternating  
38 between the metal source solution (1 mM copper(II) acetate), a solution of 0.2 mM 1,3,5-benzenetricarboxylic  
39 acid (BTC) in ethanol and pure ethanol as described previously.

40 The *UV-Vis spectra* were recorded in the range of 200 nm to 800 nm by means of a Cary5000 spectrometer  
41 with a UMA unit from Agilent. The UV-Vis spectra of the SURMOFs on the quartz substrate were measured  
42 in transmission mode.

43 *Transmission electron microscopy (TEM)*: Plane-view measurements have been performed using an image  
44 aberration corrected FEI Titan 80-300 operated at 300 kV and equipped with a Gatan US1000 CCD camera  
45 for TEM and SAED analysis and a Fischione HAADF detector for STEM imaging. An EDAX S-UTW  
46 detector was used for EDX analysis. The SAED and STEM analysis was performed at LN<sub>2</sub> temperatures to  
47 reduce electron beam damage of the HKUST-1. For TEM measurement, samples were prepared by remove  
48 the Bi<sub>2</sub>O<sub>3</sub>@HKUST-1 thin films from quartz-glass sample surface through a laser ablation-process (see Fig.  
49 S1) and transfer the thin films onto a holey carbon Au grid (Quantifoil GmbH).

50 *Laser-Ablation Process*: Bi<sub>2</sub>O<sub>3</sub>@HKUST-1 has been directly grown on HR-TEM grids or was deposited as  
51 crystal-pieces through a laser micromachining process. The latter approach was performed by laser lift-off  
52 initiated by selective laser ablation using an excimer laser radiation source operating at a wavelength of  
53 248 nm with a pulse length of 5 ns.<sup>1</sup>

54 *Molecular modeling simulations* were performed using a Monte Carlo algorithm implemented in the  
55 simulation package SIMONA with Lennard-Jones and Coulomb interaction. For details on geometry  
56 optimization (using DFT) and the force field parameters, see reference. The Lennard-Jones parameters of Bi  
57 were set to 1.7295 kcal/mol and 2.8 Å.<sup>2</sup>

58 *Time-of-flight secondary ion mass spectrometry (ToF-SIMS)* was performed on a TOF.SIMS 5 instrument  
59 (ION-TOF GmbH, Münster, Germany). For all experiments a short pulse width (2 ns) 20 keV C<sub>60</sub><sup>+</sup> ion beam  
60 was applied as analysis beam. For quasi-static SIMS this beam was rastered over 500×500 μm<sup>2</sup> and the dose  
61 density was limited to below 10<sup>11</sup> ions/cm<sup>2</sup> (static limit). For dynamic SIMS, an additional O<sub>2</sub><sup>+</sup> beam (500 eV)  
62 was applied for erosion of a 450×450 μm<sup>2</sup> field with a concentric analysis field of 250×250 μm<sup>2</sup>. Spectra  
63 calibration was performed on C, Cu, Bi, and Bi<sub>3</sub>O<sub>4</sub> peaks, mass deviations were below 20 ppm.

64 *Electrospray ionisation mass spectrometry (ESI-MS)* was

65 The Bi<sub>2</sub>O<sub>3</sub> thin film sample for the XPS measurement was grown on the silicon wafer using the liquid  
66 deposition method. The deposition solution was using the BiPh<sub>3</sub> solution which after irradiated with 255 nm  
67 UV light for 5 h.

68 All HKUST-1 SURMOFs used in the present work were grown on modified Au substrates using the liquid-

69 phase epitaxy (LPE) method,<sup>1</sup> except parts of TEM and UV-vis samples were grown on quartz glass. The  
 70 surface modification was carried out by depositing a SAM (self-assembled monolayer) made from 16-  
 71 mercaptohexadecanoic acid (MHDA, 99%, Aldrich). The SURMOFs were fabricated using a spray system, as  
 72 described in detail in an earlier publication.<sup>3</sup> The spray times were 15 s for the copper acetate solution and 25  
 73 s for the BTC solution. Each spray step was followed by a rinsing step (3 s) with pure ethanol to remove  
 74 residual reactants. A total of 20-35 growth cycles were used for all SURMOFs investigated in this work.  
 75 Before further processing, all SURMOFs samples were activated by ultrasound in dichloromethane solution  
 76 for 5 min to remove residual solvent from the SURMOFs pores and characterized by X-ray diffraction (XRD)  
 77 (see Fig. 2b). Cross-sectional images recorded by scanning electron microscopy (SEM) demonstrate that the  
 78 thickness of SURMOFs amounts to about 100 nm (see also Fig. S2). For BiPh<sub>3</sub> loading, a HKUST-1  
 79 SURMOF was placed into a 250 ml flask, which was then evacuated to 200 Pa at room temperature (RT) for  
 80 30 min. Subsequently, a freshly prepared solution of BiPh<sub>3</sub> (triphenylbismuth) in ethanol (1 mM, Aldrich)  
 81 was injected quickly into the reaction flask and heated to 65°C for 36 h. BiPh<sub>3</sub> is a simple organo-bismuth  
 82 compound which is quite stable under normal conditions.<sup>4</sup> The loading of BiPh<sub>3</sub> into the HKUST-1  
 83 SURMOFs was analyzed in a quantitative fashion using a quartz crystal microbalance (QCM) (see Fig. S3).  
 84 The mass density of the activated framework amounts to 0.98 g•cm<sup>-3</sup>, which is increased by the ethanol  
 85 contained in the pores, yielding a total mass-density of the ethanol-soaked HKUST-1 of 1.53 g•cm<sup>-3</sup>.<sup>5</sup> A  
 86 quantitative analysis of the QCM-data yields a BiPh<sub>3</sub> loading of ~ 0.17 g BiPh<sub>3</sub> per 1 g ethanol-soaked  
 87 HKUST-1. This corresponds to a loading of 2-3 BiPh<sub>3</sub> molecules per HKUST-1 unit cell. After loading BiPh<sub>3</sub>,  
 88 the reaction flask with BiPh<sub>3</sub>@HKUST-1 sample was taken out from the oven and irradiated with 255 nm UV  
 89 light for 5 h. Upon irradiation, the solution turns from clear to opaque (Fig. S4). Subsequently, the sample was  
 90 removed from the reaction solution, rinsed with pure ethanol and dried in dry N<sub>2</sub> gas. Then, the sample was  
 91 irradiated with 255 nm UV light for 1 h.

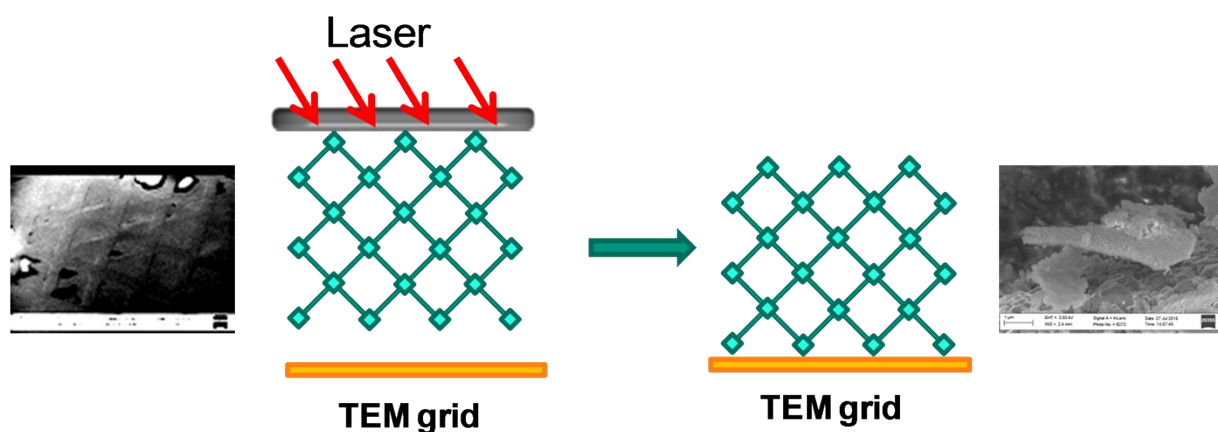

(a)

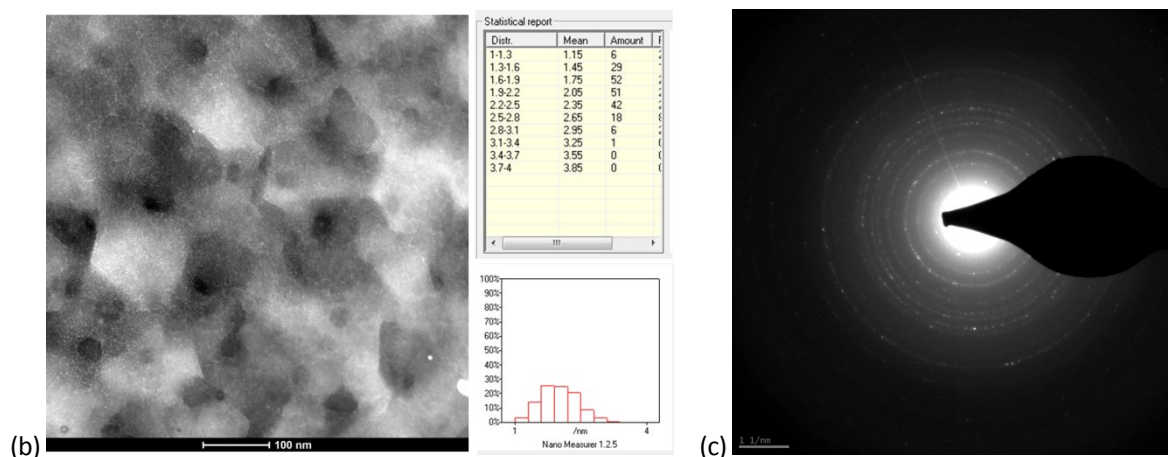

95  
96

97 Figure S1. Synthesis scheme of the  $\text{Bi}_2\text{O}_3$ @HKUST-1 SURMOFs TEM sample preparation by a laser ablation process.  
98 b) HR-TEM of embedded  $\text{Bi}_2\text{O}_3$  NPs in the surface of oriented HKUST-1 SURMOF. (c) cryo-SAED diffraction pattern  
99 of deposited HKUST-1 thin films, see also TableS1.

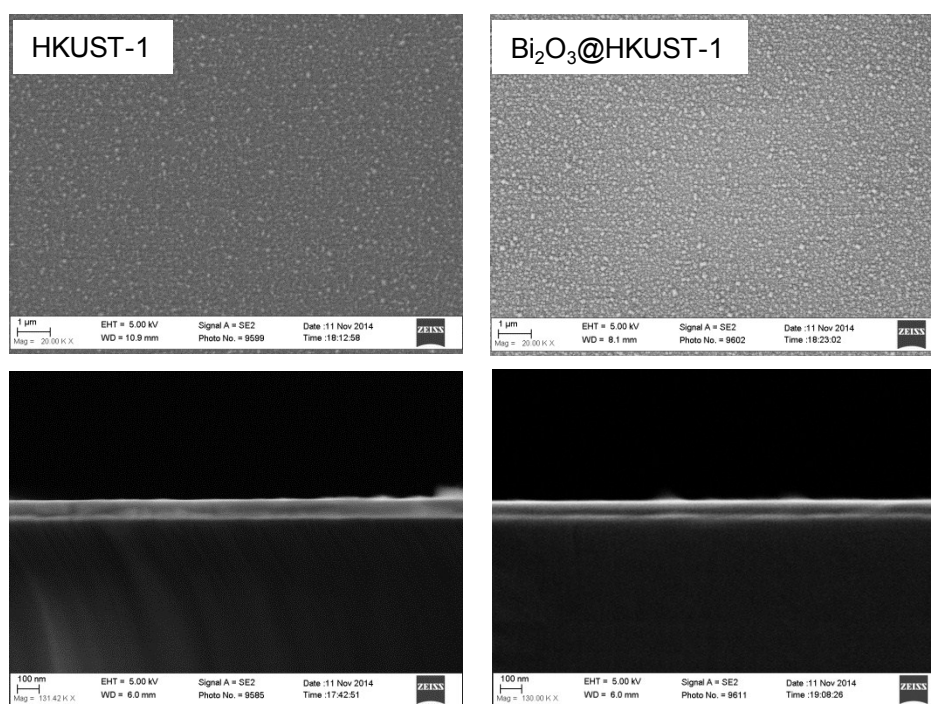

100

101 Figure S2. Scanning electron micrograph (SEM) of 20 cycles of  $\text{Cu}_3(\text{BTC})_2$  MOF thin films (left) and after loading  $\text{Bi}_2\text{O}_3$   
102 (right).

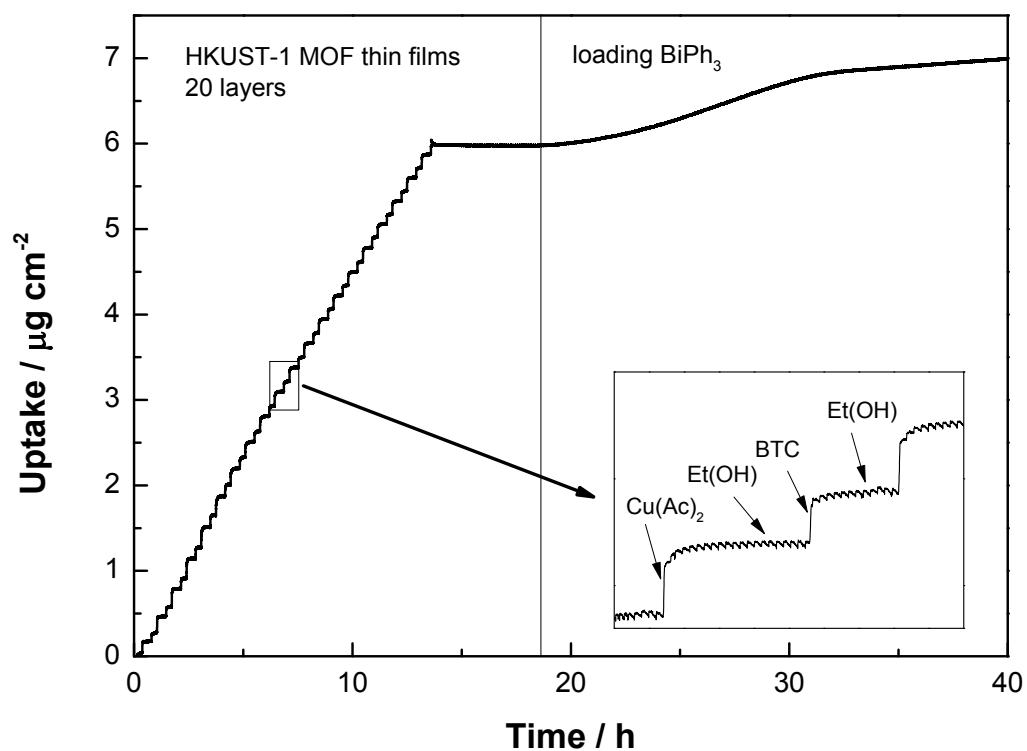

103

104 Figure S3. Layer-by-layer growth of the HKUST-1 SURMOF on the QCM sensor with 20 cycles and performed  
 105 uptake experiment with BiPh<sub>3</sub>. The inset is a magnification of the layer-by-layer growth of the SURMOF. (The  
 106 small oscillations in the curve is from the pump)

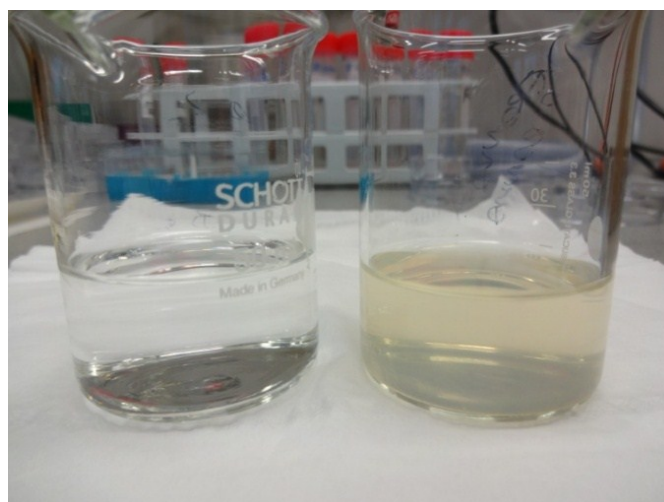

107

108 Figure S4. BiPh<sub>3</sub> ethanolic solution before irradiation (left) and after irradiation (right).

109

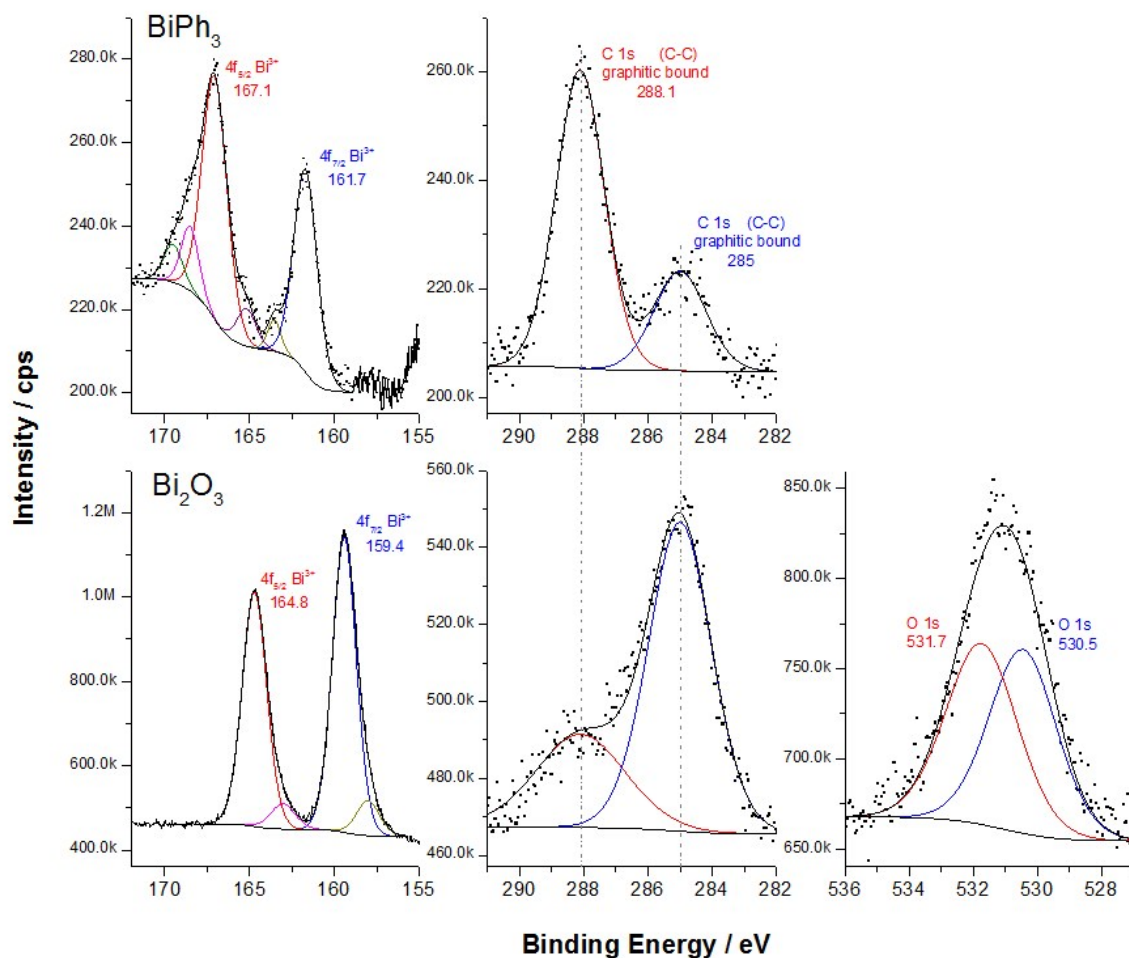

110

111 Figure S5. X-ray photoelectron spectrum (XPS) analysis for BiPh<sub>3</sub> (up) and Bi<sub>2</sub>O<sub>3</sub> (down).

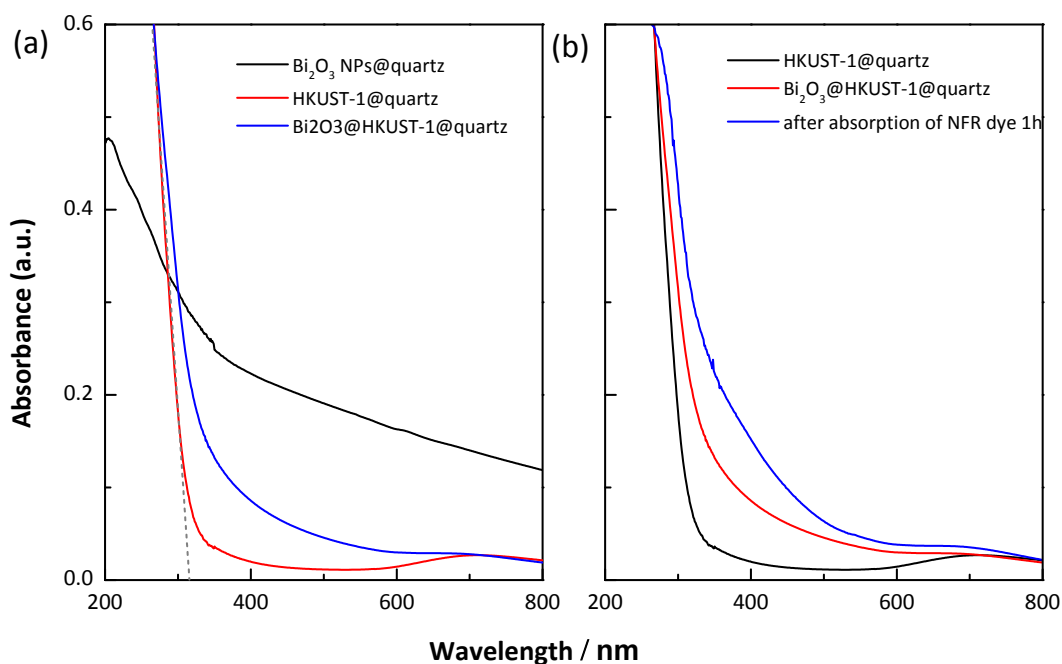

112

113 Figure S6. (a) UV-Vis absorption spectra of the Bi<sub>2</sub>O<sub>3</sub> thin films on quartz glass (black), HKUST-1 SURMOFs (red) and

114 Bi<sub>2</sub>O<sub>3</sub>@HKUST-1 SURMOFs (blue). (b) UV-Vis absorption spectra of HKUST-1 SURMOFs (black), Bi<sub>2</sub>O<sub>3</sub>@HKUST-1



115 SURMOFs (red) and  $\text{Bi}_2\text{O}_3$ @HKUST-1 SURMOFs after absorption of NFR dye 1 h (blue).

### 1 $\text{BiPh}_3$ @HKUST-1

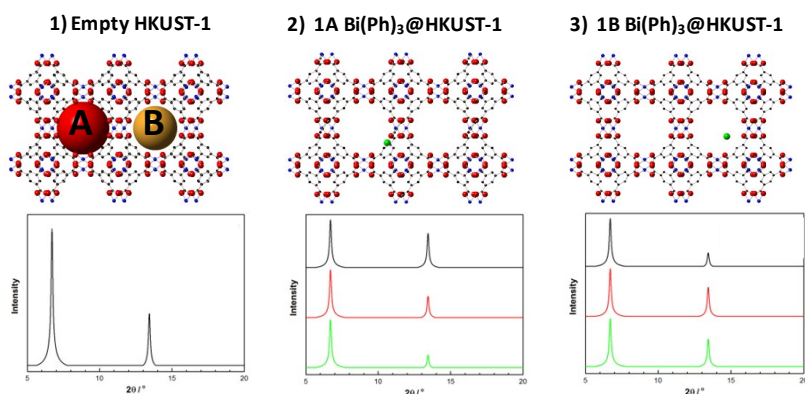

### 2 $\text{BiPh}_3$ @HKUST-1

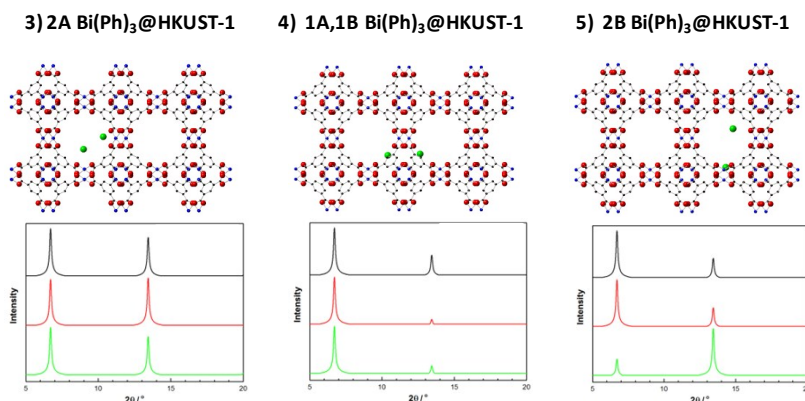

### 3 $\text{BiPh}_3$ @HKUST-1

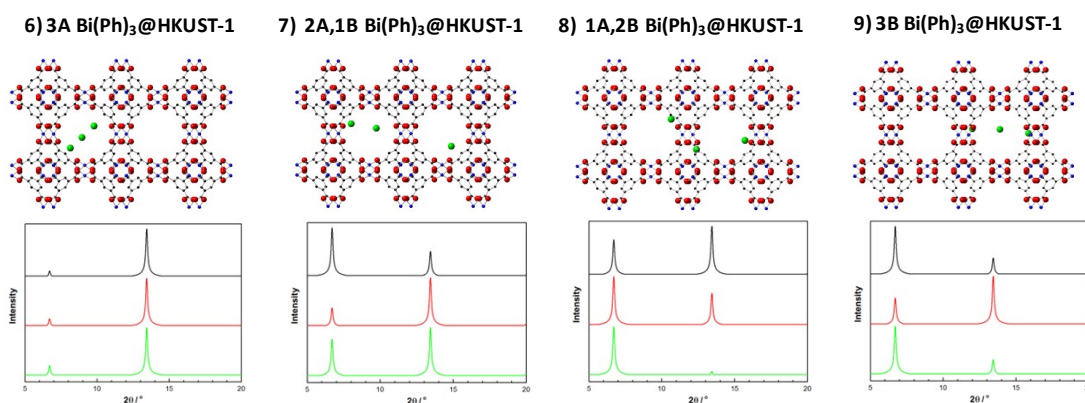

116

117 Figure S7. Schematic structure of HKUST-1 (1) (large pore: A, middle pore: B) and after loading different number  
 118 [single  $\text{Bi}^{3+}$  in A (1), single  $\text{Bi}^{3+}$  in B (2), 2  $\text{Bi}^{3+}$  in A (3), 1  $\text{Bi}(\text{Ph})_3$  in A and 1  $\text{Bi}^{3+}$  in B (4), 2  $\text{Bi}^{3+}$  in B (5), 3  $\text{Bi}^{3+}$  in A (6),  
 119 2  $\text{Bi}^{3+}$  in A and 1  $\text{Bi}^{3+}$  in B (7), 1  $\text{Bi}^{3+}$  in A and 2  $\text{Bi}^{3+}$  in B (8), 3  $\text{Bi}^{3+}$  in B (9)]. Calculated X-ray diffraction patterns for  
 120 HKUST-1 before and after loading  $\text{Bi}^{3+}$  in different plane [(001) plane (up, black line), (010) plane (middle, red line)  
 121 and (100) plane (down, green line)]. The anion was hidden.

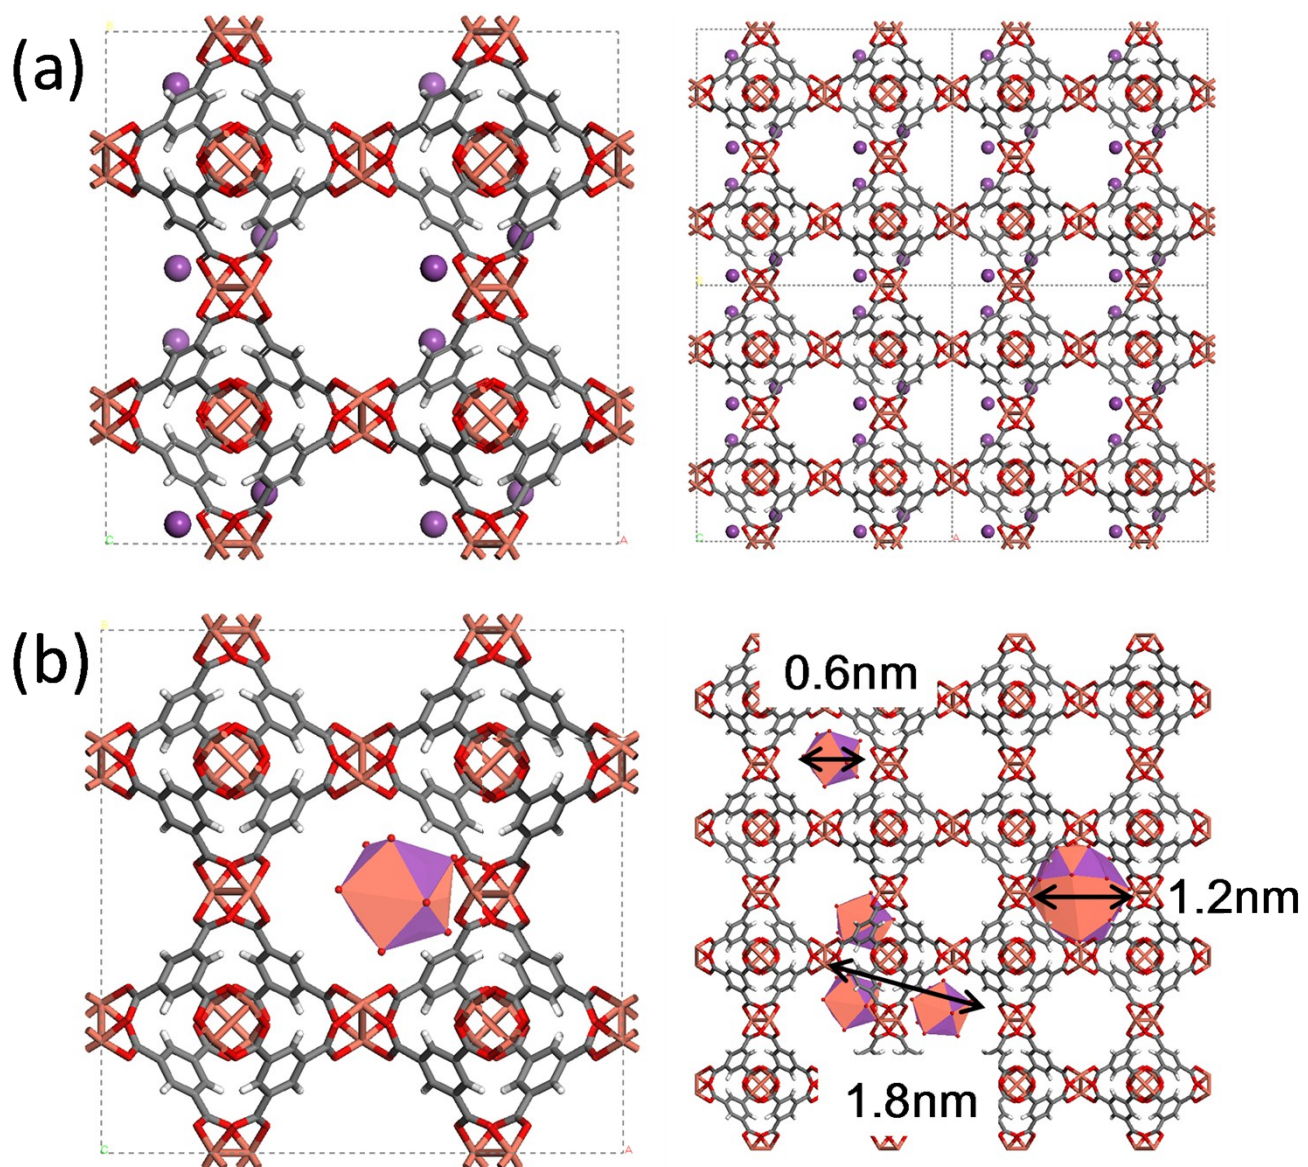

122

123 Figure S8. a) Infiltration of three BiPh<sub>3</sub> molecules inside an HKUST-1 pore. b) Model of photosynthesized (Bi<sub>2</sub>O<sub>3</sub>)<sub>n</sub>  
 124 Clusters/NPs with  $n = 1-5$  in the defined pore-space of HKUST-1, avoiding sintering with particles from adjacent  
 125 pores.



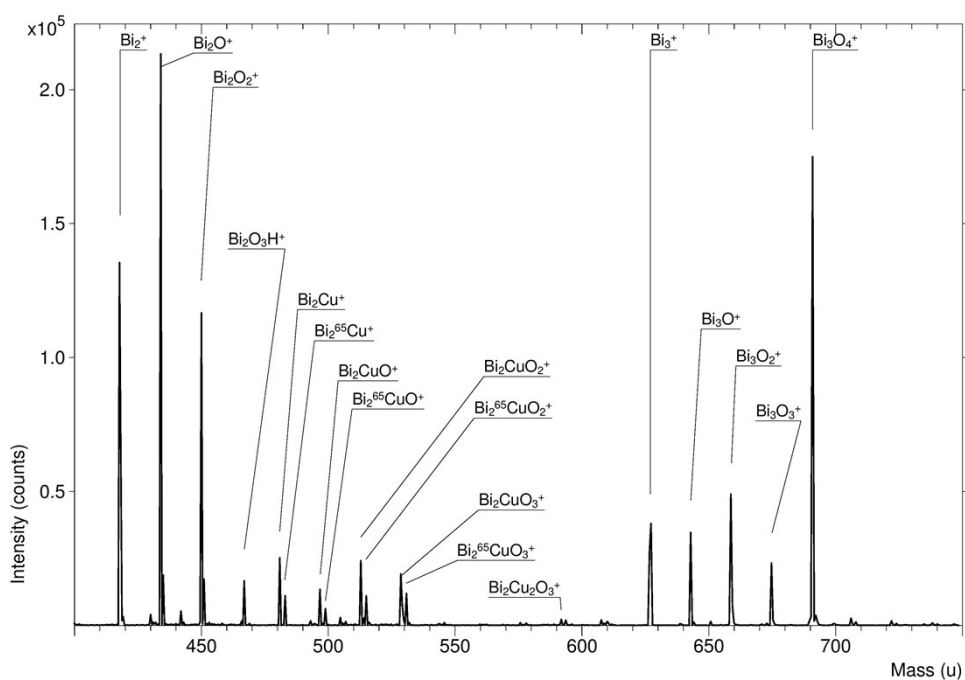

126

127 Figure S9. Quasi-static SIMS of a  $\text{Bi}_2\text{O}_3$ @HKUST-1 SURMOF stack performed with  $\text{C}_{60}$  (20 keV) bunched.  $400 < m/z$   
 128  $< 750$ .

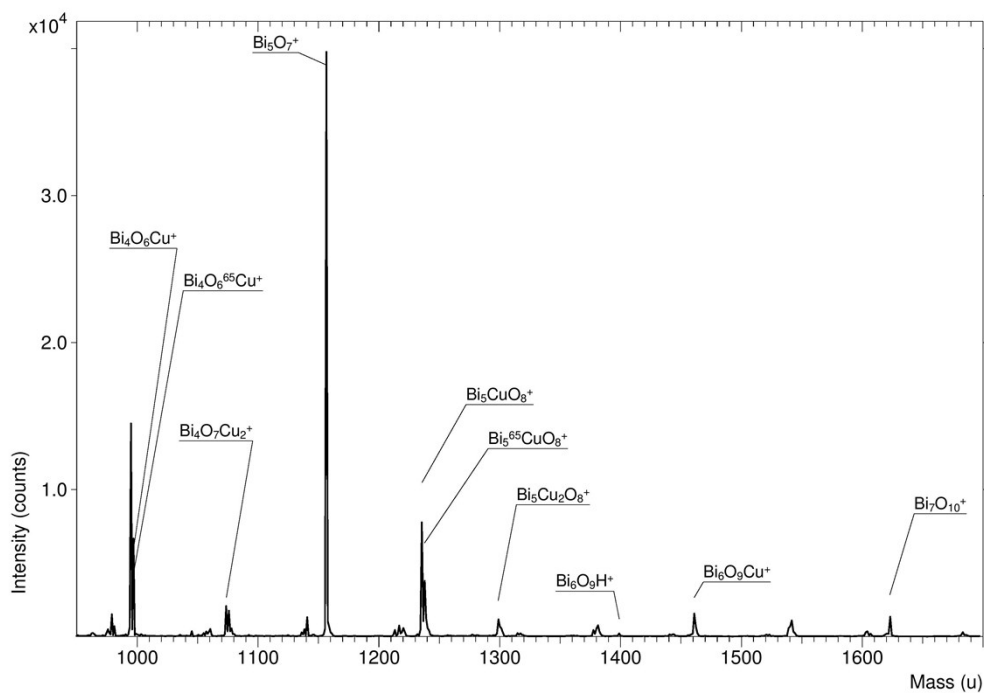

129

130 Figure S10. Quasi-static SIMS of a  $\text{Bi}_2\text{O}_3$ @HKUST-1 SURMOF stack performed with  $\text{C}_{60}$  (20 keV) bunched.  $950 <$

131  $m/z < 1700$

132 As shown in Figs. S9 and S10, the positive polarity secondary ion mass spectrum obtained under quasi-static  
133 conditions from a  $\text{Bi}_2\text{O}_3$ @HKUST-1 SURMOF stack is dominated by several bismuth oxides and  $\text{Bi}_x\text{O}_y\text{Cu}_z$  cluster  
134 ions. The bismuth oxide fragment  $\text{Bi}_2\text{O}$  shows highest intensity (212 kcts) followed by  $\text{Bi}_3\text{O}_4$  (170 kcts),  $\text{Bi}_4\text{O}_5$  17  
135 (kcts), and  $\text{Bi}_5\text{O}_7$  (39 kcts). A marked drop in intensity is observed for bismuth oxide clusters bigger than  $\text{Bi}_5\text{O}_7$ .  
136  $\text{Bi}_6\text{O}_9$  is not detectable,  $\text{Bi}_7\text{O}_{10}$  has an intensity of only 1 kcts.

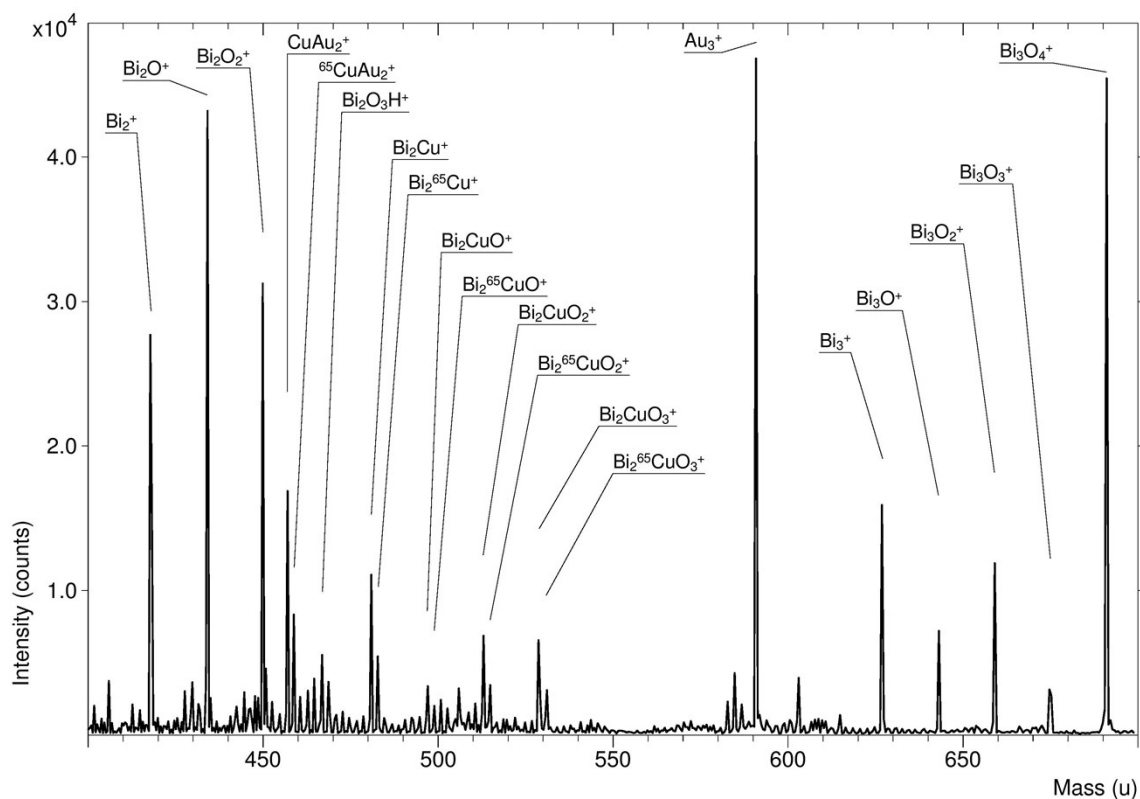

137

138 Figure S11. Dynamic SIMS of a  $\text{Bi}_2\text{O}_3$ @HKUST-1 SURMOF stack performed with  $\text{C}_{60}$  (20 keV, 0.1 pA) bunched  
139 analysis beam and  $\text{O}_2$  (500 eV, 110 nA) sputter beam.  $400 < m/z < 700$ .

140 Under dynamic SIMS conditions, using a high current oxygen sputter beam to erode the surface of a  
141  $\text{Bi}_2\text{O}_3$ @HKUST-1 SURMOF stack gold peaks from the substrate appear and new cluster ions like  $\text{CuAu}_2$  are formed  
142 due to the mixing process during ion bombardment.

143

144

145

146

147

148 Table S1: SAED (Selected Area Electron Diffraction) data and lattice spacing (d) for comparison between electron  
149 diffraction and XRD data of [111] oriented HKUST-1.

|  | SAED d<br>[nm] | HKUST<br>[111]<br>d [nm] |   |   |   |
|--|----------------|--------------------------|---|---|---|
|  |                | H                        | K | L |   |
|  | 0.915          | 0.93                     | 2 | 2 | 0 |
|  |                | 0                        |   |   |   |
|  | 0.547          | 0.53                     | 2 | 2 | 4 |
|  |                | 7                        |   |   |   |
|  | 0.470          | 0.46                     | 4 | 4 | 0 |
|  |                | 5                        |   |   |   |
|  | 0.359          | 0.35                     | 2 | 4 | 6 |
|  |                | 1                        |   |   |   |
|  | 0.310          | 0.31                     | 6 | 6 | 0 |
|  |                | 0                        |   |   |   |
|  | 0.265          | 0.26                     | 4 | 4 | 8 |
|  |                | 8                        |   |   |   |
|  | 0.222          | 0.21                     | 6 | 4 | 1 |
|  |                | 3                        |   |   | 0 |

150

151

152

153

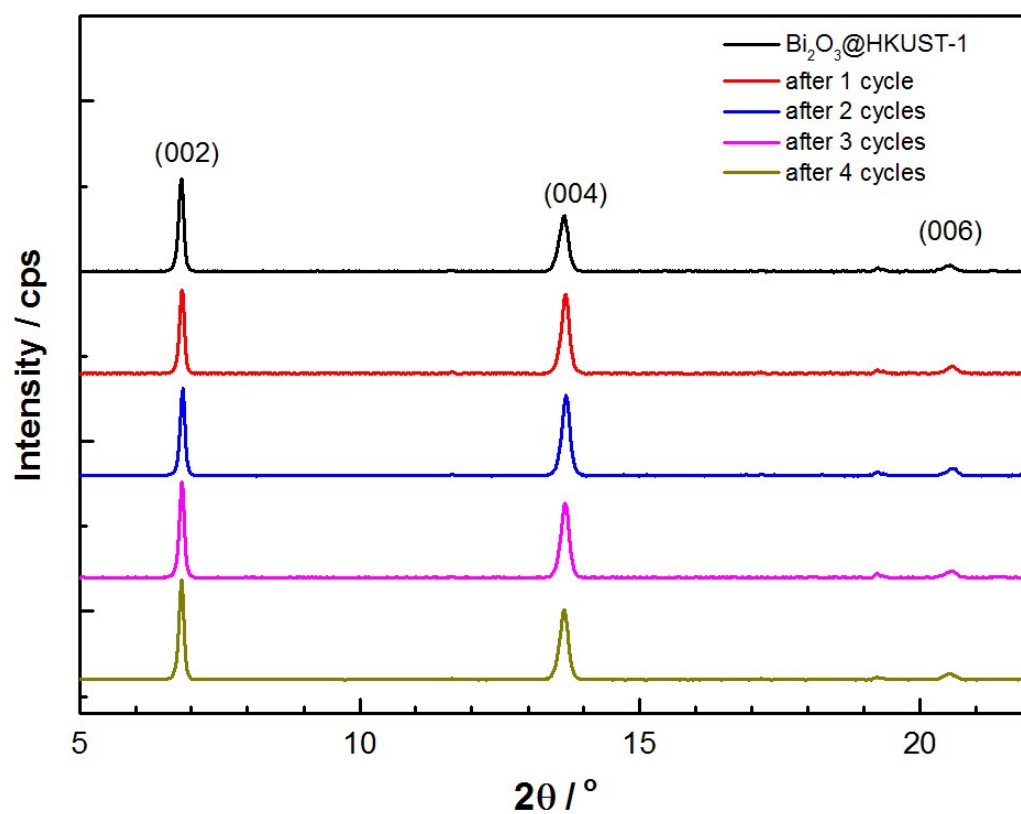

154

155 Figure S12. XRD patterns for  $\text{Bi}_2\text{O}_3@HKUST-1$  SURMOF before and after reaction.

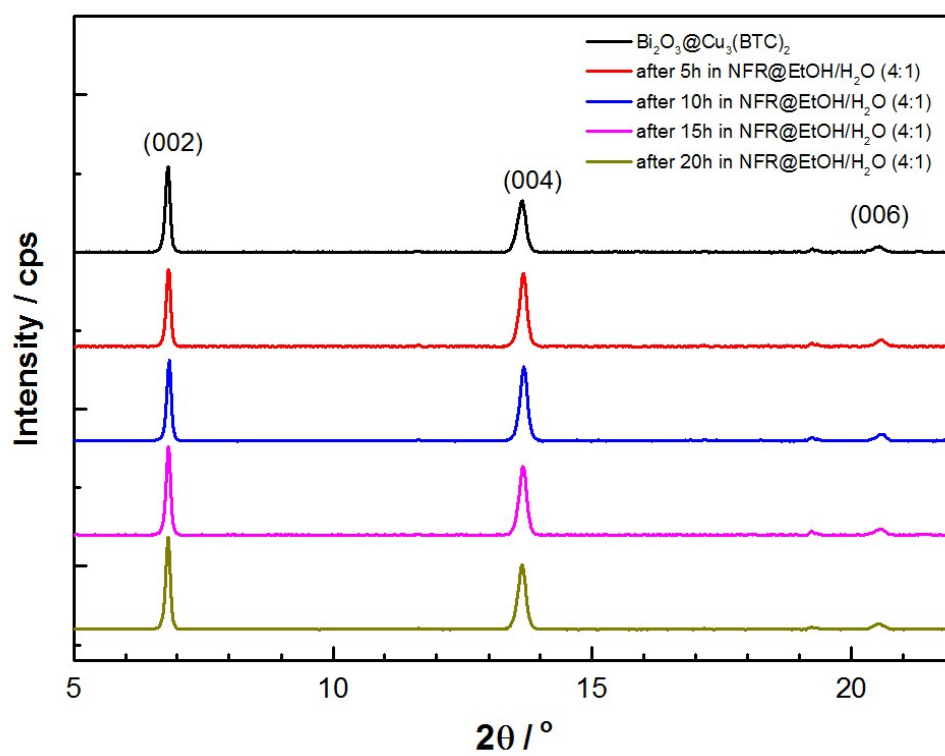

156

Figure S13. XRD patterns for Bi<sub>2</sub>O<sub>3</sub>@HKUST-1 SURMOF in NFR@EtOH/H<sub>2</sub>O solution for different times.

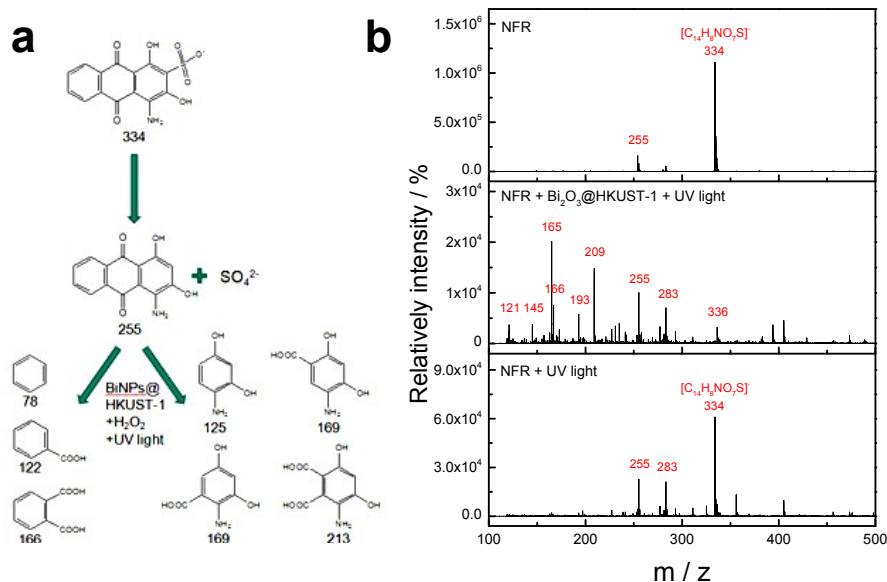

Figure S14. (a) Proposed degradation pathway of NFR using the Bi<sub>2</sub>O<sub>3</sub>@ HKUST-1 SURMOF for the photodegradation of NFR under UV light irradiation. (b) ESI-MS of the NFR solution (top), NFR solution after UV light exposure with Bi<sub>2</sub>O<sub>3</sub>@HKUST-1 SURMOF (middle), and NFR solution after UV light exposure without any catalyst (bottom). As shown in Figure S14, the application of the Bi<sub>2</sub>O<sub>3</sub>@HKUST-1 SURMOF catalysis system leads to an efficient photodegradation of the parent compound, NFR, and to an enhanced formation of smaller photodegradation products.

## References

- 1 W. Pfleging, R. Kohler, I. Südmeyer and M. Rohde, *Springer Series in Materials Science*, 2013, 161, 319.
- 2 A. Maulana, Z. Suud, K.D. Hermawan, etc, *Prog. Nucl. Energ.*, 2008, 50, 616-620.
- 3 H. K. Arslan, O. Shekhah, D. C. F. Wieland, M. Paulus, C. Sternemann, M. A. Schroer, S. Tiemeyer, M. Tolan, R. A. Fischer and C. Wöll, *J. Am. Chem. Soc.*, 2011, 133, 8158.
- 4 H. K. Arslan, O. Shekhah, J. Wohlgemuth, M. Franzreb, R. A. Fischer and C. Wöll, *Advanced functional materials*, 2011, 21, 4228.
- 5 L. Heinke, Z. G. Gu and C. Wöll, *Nat Commun*, 2014, 5.
